# Supplementary material
Source: PubMed Central journal article supplement (PMC1794281)

*WT*

*Nkx6.1<sup>-/-</sup>*

SOX9

A

B

e15.5

e15.5

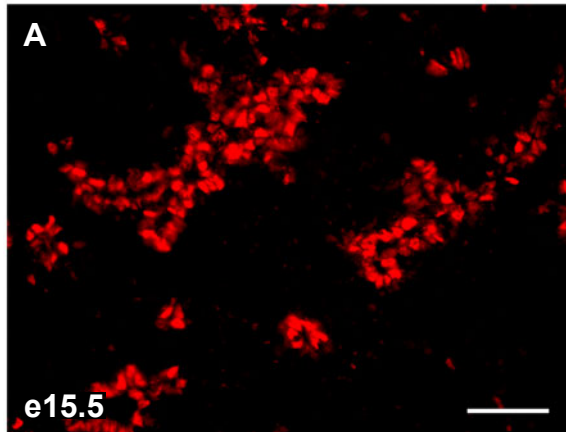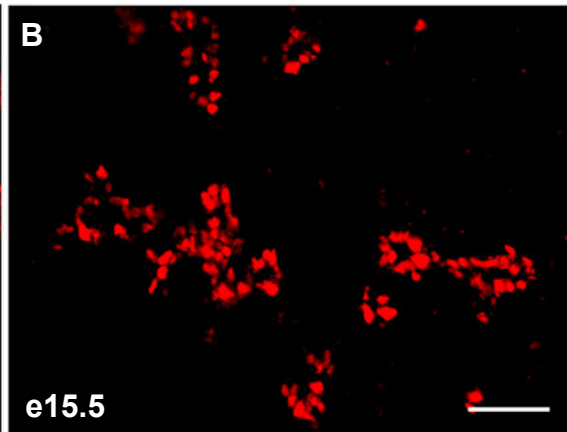

Supplement: pnas_0609217104_1.pdf [file pnas_0609217104_1.pdf]

**WT**

**Sox9 <sup>$\Delta$ pan/ $\Delta$ pan</sup>**

**BRDU/PDX1**

**A**

**B**

**e11.5**

**e11.5**

**TUNEL**

**C**

**D**

**e11.5**

**e11.5**

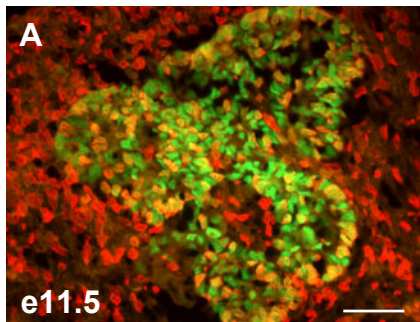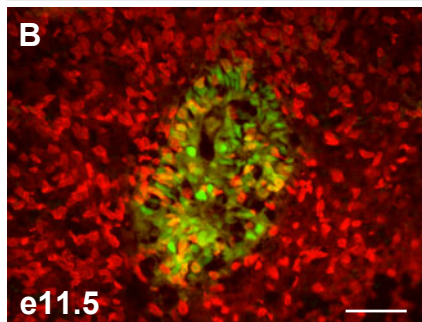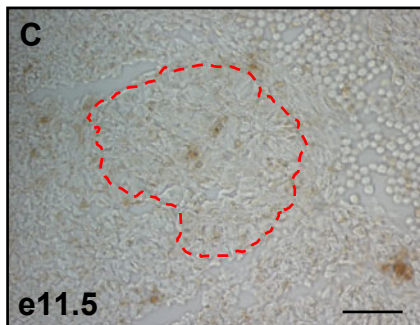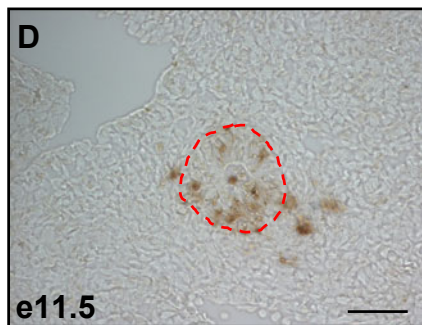

Supplement: pnas_0609217104_2.pdf [file pnas_0609217104_2.pdf]

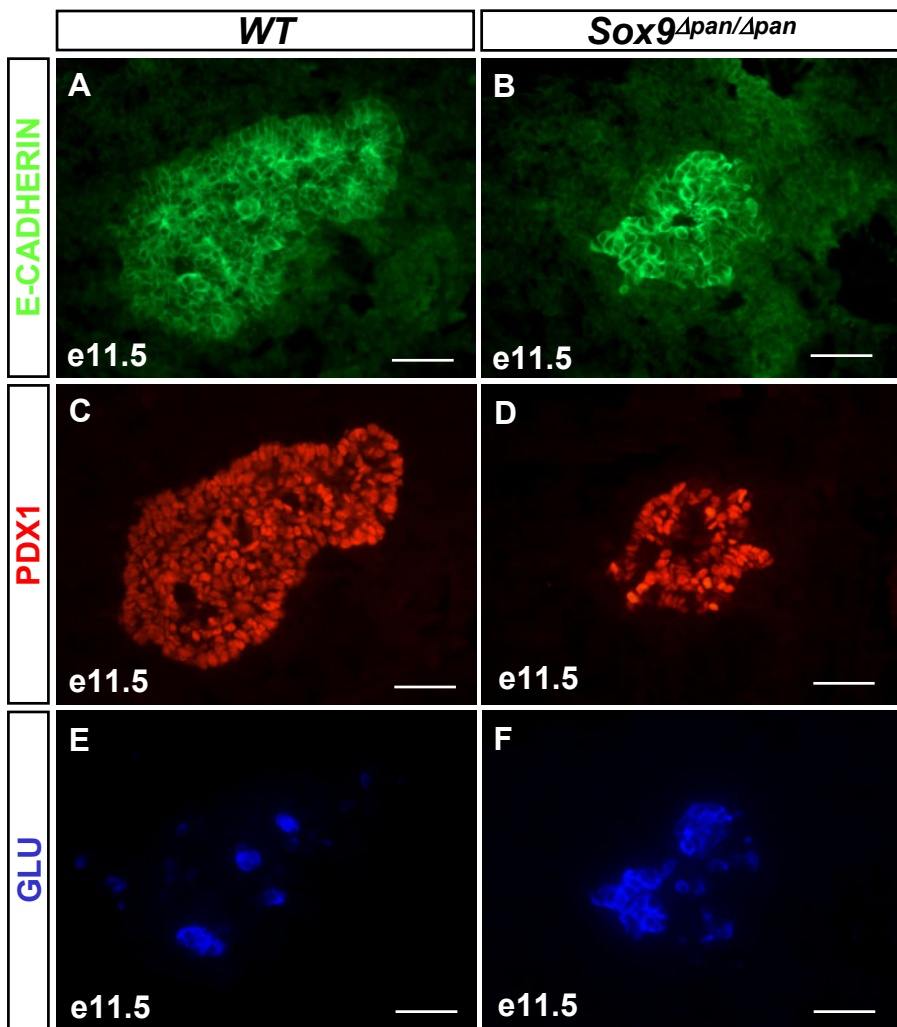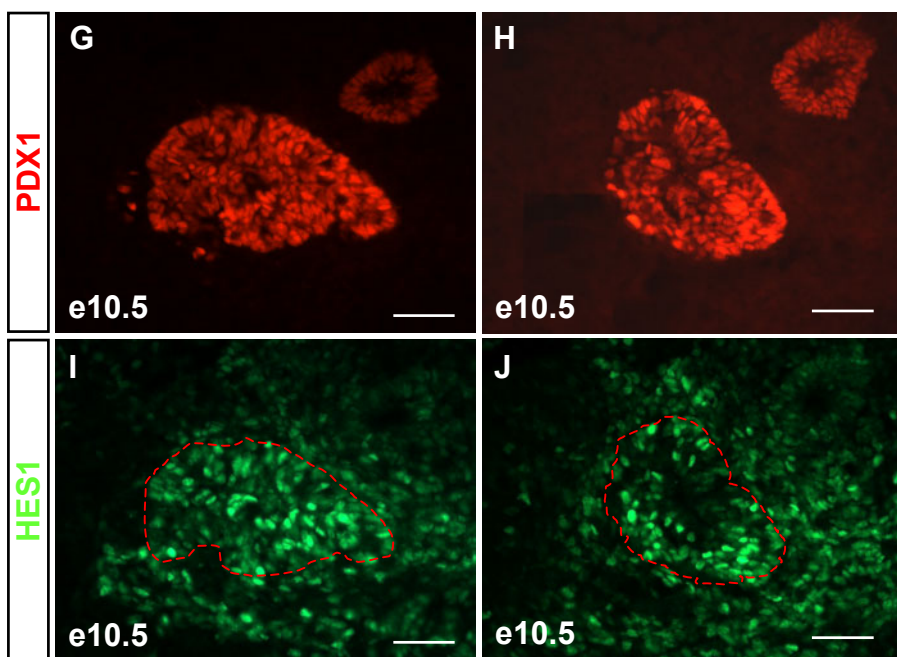

Supplement: pnas_0609217104_3.pdf [file pnas_0609217104_3.pdf]
